# Supplementary material for: A novel long non-coding RNA, AC012456.4, as a valuable and independent prognostic biomarker of survival in oral squamous cell carcinoma
Source: PeerJ. 2018 Aug 13;6:e5307. doi: 10.7717/peerj.5307 (PMC6095106; doi:10.7717/peerj.5307)
Supplement: Table S2 — Univariate and multivariate Cox regression analyses were applied to evaluate the 21 candidate lncRNA signatures as independent prognostic variables. [file peerj-06-5307-s002.xls]

## Sheet: OS
Variables	Univariate analysis				Multivariate analysis
	P value	HR	95% CI		P value	HR	95% CI
Age	0.003	1.021	1.007,1.036		0.001	1.026	1.011,1.041
Gender	0.459	1.15	0.794,1.665		0.481	1.145	0.786,1.666
Grade	0.127	1.215	0.946,1.560		0.062	1.276	0.988,1.648
Stage(age=1)	0.034	1.425	1.026,1.978		0.21	0.765	0.503,1.163
(age=2)	0.523	1.08	0.853,1.367
N	0.015	1.263	1.046,1.524		0.011	1.279	1.059,1.546
T(age=1)	0.003	1.551	1.160,2.075		0.293	1.101	0.921,1.316
(age=2)	0.873	0.982	0.783,1.230
AC012456.4	0.006	0.706	0.551,0.903		0.002	0.672	0.523,0.863
Variables	Univariate analysis				Multivariate analysis
	P value	HR	95% CI		P value	HR	95% CI
Age	0.003	1.021	1.007,1.036		0.003	1.023	1.008,1.038
Gender	0.459	1.15	0.794,1.665		0.407	1.173	0.805,1.708
Grade	0.127	1.215	0.946,1.560		0.139	1.207	0.941,1.549
Stage(age=1)	0.034	1.425	1.026,1.978		0.184	0.753	0.495,1.145
(age=2)	0.523	1.08	0.853,1.367
M	0.316	2.749	0.381,19.850		0.173	4.017	0.543,29.708
N	0.015	1.263	1.046,1.524		0.029	1.235	1.022,1.493
T(age=1)	0.003	1.551	1.160,2.075		0.187	1.126	1.944,1.342
(age=2)	0.873	0.982	0.783,1.230
CTD-2545H1.2(age=1)	0.005	0.746	0.607,0.916		0.086	0.895	0.788,1.016
(age=2)	0.623	0.958	0.809,1.136
Variables	Univariate analysis				Multivariate analysis
	P value	HR	95% CI		P value	HR	95% CI
Age	0.003	1.021	1.007,1.036		0.002	1.024	1.009,1.039
Gender	0.459	1.15	0.794,1.665		0.331	1.206	0.827,1.759
Grade	0.127	1.215	0.946,1.560		0.11	0.225	0.955,1.527
Stage(age=1)	0.034	1.425	1.026,1.978		0.189	0.758	0.501,1.146
(age=2)	0.523	1.08	0.853,1.367
M	0.316	2.749	0.381,19.850		0.3	2.892	0.388,21.573
N	0.015	1.263	1.046,1.524		0.011	1.277	1.058,1.542
T(age=1)	0.003	1.551	1.160,2.075		0.244	1.11	0.932,1.321
(age=2)	0.873	0.982	0.783,1.230
RP11-181E10.3	0.02	0.84	0.725,0.973		0.018	0.837	0.723,0.970
Variables	Univariate analysis				Multivariate analysis
	P value	HR	95% CI		P value	HR	95% CI
Age	0.003	1.021	1.007,1.036		0.001	1.025	1.010,1.040
Gender	0.459	1.15	0.794,1.665		0.545	1.124	0.770,1.640
Grade	0.127	1.215	0.946,1.560		0.127	1.219	0.946,1.572
Stage(age=1)	0.034	1.425	1.026,1.978		0.177	0.752	0.497,1.138
(age=2)	0.523	1.08	0.853,1.367
M	0.316	2.749	0.381,19.850		0.244	3.288	0.444,24.327
N	0.015	1.263	1.046,1.524		0.013	1.268	1.050,1.530
T(age=1)	0.003	1.551	1.160,2.075		0.252	1.108	0.930,1.320
(age=2)	0.873	0.982	0.783,1.230
RP11-1C8.7	0.045	1.107	1.002,1.222		0.036	1.112	1.007,1.227
Variables	Univariate analysis				Multivariate analysis
	P value	HR	95% CI		P value	HR	95% CI
Age	0.003	1.021	1.007,1.036		0.003	1.023	1.008,1.038
Gender	0.459	1.15	0.794,1.665		0.383	1.182	0.812,1.722
Grade	0.127	1.215	0.946,1.560		0.153	1.204	0.934,1.552
Stage(age=1)	0.034	1.425	1.026,1.978		0.153	0.736	0.483,1.121
(age=2)	0.523	1.08	0.853,1.367
M	0.316	2.749	0.381,19.850		0.228	3.421	0.463,25.284
N	0.015	1.263	1.046,1.524		0.021	1.25	1.035,1.510
T(age=1)	0.003	1.551	1.160,2.075		0.258	1.106	0.929,1.318
(age=2)	0.873	0.982	0.783,1.230
RP11-286E11.1	0.003	1.264	1.080,1.478		0.005	1.253	1.071,1.466
Variables	Univariate analysis				Multivariate analysis
	P value	HR	95% CI		P value	HR	95% CI
Age	0.003	1.021	1.007,1.036		0.001	1.025	1.010,1.040
Gender	0.459	1.15	0.794,1.665		0.503	1.138	0.780,1.660
Grade	0.127	1.215	0.946,1.560		0.176	1.191	0.925,1.535
Stage(age=1)	0.034	1.425	1.026,1.978		0.213	0.763	0.499,1.167
(age=2)	0.523	1.08	0.853,1.367
M	0.316	2.749	0.381,19.850		0.204	3.631	0.496,26.573
N	0.015	1.263	1.046,1.524		0.027	1.239	1.025,1.498
T(age=1)	0.003	1.551	1.160,2.075		0.232	1.115	0.933,1.331
(age=2)	0.873	0.982	0.783,1.230
RP11-796E2.4(age=1)	0.932	0.991	0.804,1.221		0.062	0.885	0.778,1.006
(age=2)	0.015	0.814	0.691,0.960
Variables	Univariate analysis				Multivariate analysis
	P value	HR	95% CI		P value	HR	95% CI
Age	0.003	1.021	1.007,1.036		0.002	1.024	1.009,1.039
Gender	0.459	1.15	0.794,1.665		0.551	1.122	0.768,1.638
Grade	0.127	1.215	0.946,1.560		0.181	1.189	0.923,1.531
Stage(age=1)	0.034	1.425	1.026,1.978		0.152	0.734	0.481,1.120
(age=2)	0.523	1.08	0.853,1.367
M	0.316	2.749	0.381,19.850		0.176	3.983	0.538,29.483
N	0.015	1.263	1.046,1.524		0.029	1.235	1.021,1.494
T(age=1)	0.003	1.551	1.160,2.075		0.182	1.127	0.946,1.344
(age=2)	0.873	0.982	0.783,1.230
RP11-897M7.1	0.059	0.885	0.780,1.005		0.1	0.898	0.790,1.021
Variables	Univariate analysis				Multivariate analysis
	P value	HR	95% CI		P value	HR	95% CI
Age	0.003	1.021	1.007,1.036		0.001	1.024	1.009,1.039
Gender	0.459	1.15	0.794,1.665		0.718	1.074	0.730,1.580
Grade	0.127	1.215	0.946,1.560		0.203	1.182	0.914,1.529
Stage(age=1)	0.034	1.425	1.026,1.978		0.184	0.755	0.498,1.143
(age=2)	0.523	1.08	0.853,1.367
M	0.316	2.749	0.381,19.850		0.219	3.506	0.474,25.911
N	0.015	1.263	1.046,1.524		0.012	0.271	1.053,1.533
T(age=1)	0.003	1.551	1.160,2.075		0.218	1.116	0.937,1.329
(age=2)	0.873	0.982	0.783,1.230
RP11-93B14.9	0.046	0.881	0.778,0.999		0.031	0.872	0.771,0.987

## Sheet: DFS
Variables	Univariate analysis				Multivariate analysis
	P value	HR	95% CI		P value	HR	95% CI
Age	0.093	1.017	0.997,1.036		0.071	1.018	0.999,1.037
Gender	0.627	1.132	0.687,1.867		0.678	1.113	0.672,1.841
Grade	0.817	1.043	0.732,1.485		0.533	1.125	0.777,1.627
Stage	0.625	1.064	0.830,1.363		0.482	0.852	0.545,1.332
N	0.539	1.085	0.7837,1.407		0.167	1.286	0.900,1.836
T	0.191	1.167	0.926,1.470		0.295	1.134	0.896,1.434
AC012456.4	0.004	0.601	0.423,0.853		0.004	0.6	0.423,0.851
Variables	Univariate analysis				Multivariate analysis
	P value	HR	95% CI		P value	HR	95% CI
Age	0.093	1.017	0.997,1.036		0.312	1.01	0.990,1.031
Gender	0.627	1.132	0.687,1.867		0.536	1.174	0.706,1.952
Grade	0.817	1.043	0.732,1.485		0.751	1.059	0.741,1.514
Stage	0.625	1.064	0.830,1.363		0.174	0.727	0.460,1.151
M	0.971	<0.000	0,1.249E+228		0.975	<0.000	0,4.536E+236
N	0.539	1.085	0.7837,1.407		0.356	1.176	0.833,1.661
T	0.191	1.167	0.926,1.470		0.168	1.175	0.934,1.478
CTD-2545H1.2	0.007	0.773	0.640,0.932		0.004	0.763	0.634,0.918
Variables	Univariate analysis				Multivariate analysis
	P value	HR	95% CI		P value	HR	95% CI
Age	0.093	1.017	0.997,1.036		0.108	1.016	0.997,1.035
Gender	0.627	1.132	0.687,1.867		0.494	1.194	0.719,1.982
Grade	0.817	1.043	0.732,1.485		0.612	1.096	0.769,1.563
Stage	0.625	1.064	0.830,1.363		0.392	0.822	0.526,1.287
M	0.971	<0.000	0,1.249E+228		0.973	<0.000	0,2.031E+235
N	0.539	1.085	0.7837,1.407		0.11	1.336	0.937,1.904
T	0.191	1.167	0.926,1.470		0.242	1.148	0.911,1.446
RP11-181E10.3	0.028	0.801	0.657,0.976		0.027	0.801	0.659,0.975
Variables	Univariate analysis				Multivariate analysis
	P value	HR	95% CI		P value	HR	95% CI
Age	0.093	1.017	0.997,1.036		0.095	1.016	0.997,1.036
Gender	0.627	1.132	0.687,1.867		0.866	1.045	0.626,1.745
Grade	0.817	1.043	0.732,1.485		0.789	1.051	0.729,1.517
Stage	0.625	1.064	0.830,1.363		0.36	0.812	0.519,1.269
M	0.971	<0.000	0,1.249E+228		0.974	<0.000	0,8.273E+234
N	0.539	1.085	0.7837,1.407		0.156	1.287	0.908,1.824
T	0.191	1.167	0.926,1.470		0.192	1.166	0.926,1.468
RP11-1C8.7	0.032	1.155	1.012,1.318		0.029	1.157	1.015,1.318
Variables	Univariate analysis				Multivariate analysis
	P value	HR	95% CI		P value	HR	95% CI
Age	0.093	1.017	0.997,1.036		0.136	1.015	0.995,1.034
Gender	0.627	1.132	0.687,1.867		0.661	1.12	0.675,1.858
Grade	0.817	1.043	0.732,1.485		0.897	1.025	0.709,1.482
Stage	0.625	1.064	0.830,1.363		0.325	0.795	0.503,1.256
M	0.971	<0.000	0,1.249E+228		0.974	<0.000	0,1.023E+237
N	0.539	1.085	0.7837,1.407		0.137	1.311	0.918,1.873
T	0.191	1.167	0.926,1.470		0.204	1.162	0.922,1.466
RP11-286E11.1	0.012	1.318	1.062,1.635		0.008	1.339	1.078,1.664
Variables	Univariate analysis				Multivariate analysis
	P value	HR	95% CI		P value	HR	95% CI
Age	0.093	1.017	0.997,1.036		0.08	1.017	0.998,1.037
Gender	0.627	1.132	0.687,1.867		0.758	1.084	0.650,1.805
Grade	0.817	1.043	0.732,1.485		0.95	1.012	0.702,1.457
Stage	0.625	1.064	0.830,1.363		0.334	0.796	0.501,1.265
M	0.971	<0.000	0,1.249E+228		0.974	<0.000	0,3.493E+234
N	0.539	1.085	0.7837,1.407		0.22	1.245	0.877,1.766
T	0.191	1.167	0.926,1.470		0.314	1.128	0.892,1.427
RP11-796E2.4	0.021	0.82	0.692,0.971		0.019	0.818	0.691,0.967
Variables	Univariate analysis				Multivariate analysis
	P value	HR	95% CI		P value	HR	95% CI
Age	0.093	1.017	0.997,1.036		0.107	1.016	0.997,1.035
Gender	0.627	1.132	0.687,1.867		0.77	1.079	0.647,1.799
Grade	0.817	1.043	0.732,1.485		0.948	1.012	0.702,1.459
Stage	0.625	1.064	0.830,1.363		0.236	0.756	0.477,1.200
M	0.971	<0.000	0,1.249E+228		0.974	<0.000	0,4.213E+234
N	0.539	1.085	0.7837,1.407		0.218	1.243	0.879,1.757
T	0.191	1.167	0.926,1.470		0.176	1.172	0.931,1.475
RP11-897M7.1	0.039	0.83	0.695,0.991		0.032	0.824	0.690,0.983
Variables	Univariate analysis				Multivariate analysis
	P value	HR	95% CI		P value	HR	95% CI
Age	0.093	1.017	0.997,1.036		0.191	1.013	0.993,1.034
Gender	0.627	1.132	0.687,1.867		0.941	0.98	0.584,1.646
Grade	0.817	1.043	0.732,1.485		0.94	1.015	0.694,1.484
Stage	0.625	1.064	0.830,1.363		0.31	0.795	0.510,1.239
M	0.971	<0.000	0,1.249E+228		0.975	<0.000	0,6.797E+241
N	0.539	1.085	0.7837,1.407		0.119	1.317	0.932,1.861
T	0.191	1.167	0.926,1.470		0.343	1.118	0.887,1.410
RP11-93B14.9	0.001	0.752	0.638,0.886		<0.000	0.739	0.630,0.867
